# Supplementary material for: Composition of Particulate Matter and Bacterial Community in Gut Contents and Surrounding Sediments of Three Sipunculan Species (Siphonosoma australe, Phascolosoma arcuatum, and Sipunculus nudus)
Source: MDPI journal article supplement (doi:10.3390/ijms24066001), 2023-03-22
Supplement: s1 [file s1]

|     | <i>Blastopirellula</i>  | <i>Cyanobium_<br/>PCC_6307</i> | <i>Pir4_lineage</i>     | <i>Rhodopirellula</i>   | <i>Rubripirellula</i>  | <i>Subgroup<br/>_10</i> | <i>Sulfurovum</i>       | <i>Sva0081<br/>_sediment_group</i> | <i>Synechococcus<br/>_CC9902</i> | <i>Woeseia</i>         |
|-----|-------------------------|--------------------------------|-------------------------|-------------------------|------------------------|-------------------------|-------------------------|------------------------------------|----------------------------------|------------------------|
| SAI | 5.65±1.16 <sup>b</sup>  | 2.54±1.08 <sup>ab</sup>        | 4.01±0.52 <sup>a</sup>  | 2.52±0.31 <sup>b</sup>  | 1.94±0.25 <sup>b</sup> | 0.03±0.02 <sup>c</sup>  | 0.00±0.00 <sup>c</sup>  | 0.00±0.00 <sup>c</sup>             | 7.44±2.04 <sup>b</sup>           | 0.00±0.00 <sup>c</sup> |
| SAE | 0.08±0.04 <sup>c</sup>  | 0.22±0.07 <sup>b</sup>         | 0.73±0.25 <sup>c</sup>  | 0.02±0.02 <sup>d</sup>  | 0.05±0.03 <sup>c</sup> | 0.85±0.22 <sup>b</sup>  | 3.43±1.13 <sup>b</sup>  | 6.85±0.88 <sup>a</sup>             | 0.15±0.05 <sup>b</sup>           | 2.59±1.03 <sup>b</sup> |
| PAI | 3.50±1.59 <sup>bc</sup> | 4.26±1.25 <sup>a</sup>         | 1.49±0.80 <sup>bc</sup> | 1.36±0.59 <sup>c</sup>  | 0.67±0.25 <sup>c</sup> | 0.85±0.27 <sup>b</sup>  | 0.02±0.01 <sup>c</sup>  | 0.02±0.01 <sup>c</sup>             | 2.64±0.38 <sup>b</sup>           | 0.33±0.12 <sup>c</sup> |
| PAE | 0.38±0.06 <sup>c</sup>  | 0.04±0.01 <sup>b</sup>         | 0.24±0.01 <sup>c</sup>  | 0.48±0.05 <sup>cd</sup> | 0.11±0.05 <sup>c</sup> | 4.57±0.16 <sup>a</sup>  | 0.20±0.04 <sup>c</sup>  | 0.90±0.04 <sup>c</sup>             | 0.03±0.02 <sup>b</sup>           | 6.70±0.53 <sup>a</sup> |
| SNI | 10.27±1.79 <sup>a</sup> | 2.37±1.23 <sup>ab</sup>        | 2.54±0.34 <sup>b</sup>  | 4.90±0.60 <sup>a</sup>  | 3.08±0.69 <sup>a</sup> | 0.00±0.00 <sup>c</sup>  | 0.00±0.00 <sup>c</sup>  | 0.00±0.00 <sup>c</sup>             | 18.4±6.16 <sup>a</sup>           | 0.00±0.00 <sup>c</sup> |
| SNE | 0.56±0.19 <sup>c</sup>  | 0.05±0.02 <sup>b</sup>         | 0.02±0.05 <sup>c</sup>  | 0.20±0.06 <sup>d</sup>  | 0.21±0.05 <sup>c</sup> | 0.77±0.03 <sup>b</sup>  | 18.72±1.15 <sup>a</sup> | 5.37±0.46 <sup>b</sup>             | 0.07±0.01 <sup>b</sup>           | 3.15±0.39 <sup>b</sup> |

Values in column with different letters indicate significant differences ( $p < 0.05$ ).
