# Supplementary material for: Composition of Particulate Matter and Bacterial Community in Gut Contents and Surrounding Sediments of Three Sipunculan Species (Siphonosoma australe, Phascolosoma arcuatum, and Sipunculus nudus)
Source: MDPI journal article supplement (doi:10.3390/ijms24066001), 2023-03-22
Supplement: s1 [file s1]

|     | Proteobacteria          | Planctomycetota         | Cyanobacteria           | Chloroflexi             | Desulfobacterota        | Actinobacteriota       | Unclassified<br>_Bacteria | Spirochaetota            | Campylobacterota        | Bacteroidota            |
|-----|-------------------------|-------------------------|-------------------------|-------------------------|-------------------------|------------------------|---------------------------|--------------------------|-------------------------|-------------------------|
| SAI | 17.63±2.11 <sup>b</sup> | 36.79±2.54 <sup>a</sup> | 11.52±2.86 <sup>b</sup> | 9.67±1.98 <sup>a</sup>  | 1.90±0.78 <sup>c</sup>  | 12.24±1.2 <sup>a</sup> | 5.62±0.70 <sup>b</sup>    | 0.00±0.00 <sup>b</sup>   | 0.00±0.00 <sup>c</sup>  | 0.70±0.35 <sup>c</sup>  |
| SAE | 22.00±4.56 <sup>b</sup> | 3.07±0.70 <sup>c</sup>  | 1.36±0.21 <sup>c</sup>  | 10.38±1.48 <sup>a</sup> | 23.87±1.58 <sup>a</sup> | 4.44±0.53 <sup>c</sup> | 4.61±0.70 <sup>bc</sup>   | 1.49±0.49 <sup>b</sup>   | 3.44±1.13 <sup>b</sup>  | 6.36±0.37 <sup>a</sup>  |
| PAI | 19.75±7.61 <sup>b</sup> | 21.45±9.79 <sup>b</sup> | 8.56±1.64 <sup>bc</sup> | 3.38±1.00 <sup>b</sup>  | 1.36±0.44 <sup>c</sup>  | 5.64±0.83 <sup>c</sup> | 1.15±0.16 <sup>d</sup>    | 26.25±12.78 <sup>a</sup> | 0.02±0.01 <sup>c</sup>  | 5.21±1.89 <sup>ab</sup> |
| PAE | 35.80±0.98 <sup>a</sup> | 4.13±0.19 <sup>c</sup>  | 0.41±0.04 <sup>c</sup>  | 4.73±0.08 <sup>b</sup>  | 3.01±0.52 <sup>c</sup>  | 9.01±0.60 <sup>b</sup> | 15.58±0.64 <sup>a</sup>   | 0.01±0.01 <sup>b</sup>   | 0.20±0.04 <sup>c</sup>  | 4.23±0.65 <sup>ab</sup> |
| SNI | 11.66±1.02 <sup>b</sup> | 45.49±6.58 <sup>a</sup> | 26.35±6.65 <sup>a</sup> | 8.40±0.82 <sup>a</sup>  | 0.92±0.36 <sup>c</sup>  | 2.32±0.27 <sup>d</sup> | 3.55±0.36 <sup>c</sup>    | 0.00±0.00 <sup>b</sup>   | 0.00±0.00 <sup>c</sup>  | 0.26±0.06 <sup>c</sup>  |
| SNE | 14.37±0.56 <sup>b</sup> | 3.14±0.56 <sup>c</sup>  | 6.58±0.39 <sup>bc</sup> | 11.31±0.61 <sup>a</sup> | 16.02±1.03 <sup>b</sup> | 4.66±0.30 <sup>c</sup> | 3.70±0.07 <sup>c</sup>    | 1.13±0.10 <sup>b</sup>   | 18.85±1.19 <sup>a</sup> | 2.60±0.20 <sup>bc</sup> |

Values in column with different letters indicate significant differences ( $p < 0.05$ ).
